# Supplementary material
Source: ML conference proceedings conference paper supplement (https://proceedings.neurips.cc/paper_files/paper/2016/hash/ef1e491a766ce3127556063d49bc2f98-Abstract.html)
Supplement: Supplementary file [file ef1e491a766ce3127556063d49bc2f98-Supplemental.zip]

---

# Supplemental Material for Gaussian Processes for Survival Analysis

---

|                                                                                                                          |                                                                                                                          |                                                                                                                    |
|--------------------------------------------------------------------------------------------------------------------------|--------------------------------------------------------------------------------------------------------------------------|--------------------------------------------------------------------------------------------------------------------|
| <b>Tamara Fernández</b><br>Department of Statistics,<br>University of Oxford.<br>Oxford, UK.<br>fernandez@stats.ox.ac.uk | <b>Nicolás Rivera</b><br>Department of Informatics,<br>King's College London.<br>London, UK.<br>nicolas.rivera@kcl.ac.uk | <b>Yee Whye Teh</b><br>Department of Statistics,<br>University of Oxford.<br>Oxford, UK.<br>y.w.teh@stats.ox.ac.uk |
|--------------------------------------------------------------------------------------------------------------------------|--------------------------------------------------------------------------------------------------------------------------|--------------------------------------------------------------------------------------------------------------------|

## 1 Proofs of propositions

**Proposition 1.** *Let  $(l(t))_{t \geq 0} \sim \mathcal{GP}(0, \kappa)$  be a stationary continuous Gaussian process. Suppose that  $\kappa(s)$  is non-increasing and that  $\lim_{s \rightarrow \infty} \kappa(s) = 0$ . Moreover, assume it exists  $K > 0$  and  $\alpha > 0$  such that  $\lambda_0(t) \geq Kt^{\alpha-1}$  for all  $t \geq 1$ . Let  $S(t)$  be the random survival function associated with  $(l(t))_{t \geq 0}$ , then  $\lim_{t \rightarrow \infty} S(t) = 0$  with probability 1.*

*Proof.* Denote with  $\mathbf{P}$  the probability associated with the gaussian process  $(l(t))_{t \geq 0} \sim \mathcal{GP}(0, \kappa)$  and by  $\mathbf{E}$  the corresponding expected values.

Remember our (random) hazard is given by  $\lambda(s) = \lambda_0(s)\sigma(l(s)) \geq Ks^{\alpha-1}\sigma(l(s)) \geq 0$  for  $s \geq 1$ . It is well-known that the survival function can be written as  $S(t) = e^{-\int_0^t \lambda(s)ds}$ , then

$$S(t) = e^{-\int_0^t \lambda(s)ds} \leq e^{-\int_0^1 \lambda(s)ds - \int_1^t Ks^{\alpha-1}\sigma(l(s))ds} \leq e^{-\int_1^t Ks^{\alpha-1}\sigma(l(s))ds}$$

for  $t \geq 1$ .

We just need to prove that the latter term tends to 0 as  $t$  goes to infinity. Consider the stochastic process  $(X_t)_{t \geq 0}$  given by  $X_t = \int_1^t Kt^{\alpha-1}\sigma(l(s))ds$ . We compute the expected value and variance of  $X_t$ . By Tonelli's Theorem we have that

$$\begin{aligned} \mathbf{E}(X_t) &= K\mathbf{E}\left(\int_1^t s^{\alpha-1}\sigma(l(s))ds\right) \\ &= K\int_1^t s^{\alpha-1}\mathbf{E}(\sigma(l(s)))ds \\ &= \frac{K(t^\alpha - 1)}{2\alpha} \end{aligned} \tag{1}$$

In the last equality we used that  $\mathbf{E}(\sigma(l(s))) = 1/2$  since the function  $f(x) = \sigma(x) - 1/2$  is odd.

For the variance, we use Tonelli's Theorem, again, to obtain

$$\begin{aligned} \mathbf{Var}(X_t) &= K^2\mathbf{Var}\left(\int_1^t \sigma(l(s))s^{\alpha-1}ds\right) \\ &= K^2\int_1^t \int_1^t \mathbf{Cov}(\sigma(l(x)), \sigma(l(y)))(xy)^{\alpha-1}dxdy \end{aligned} \tag{2}$$

We separate the last integral in two pieces, one integrating the region  $A = \{t, s \in [1, t] : |t - s| < 1\}$  and its complement on  $[1, t]^2$

In the region  $A$  we use that  $\mathbf{Cov}(\sigma(l(x)), \sigma(l(y))) \leq \sqrt{\mathbf{Var}(\sigma(l(x)))\mathbf{Var}(\sigma(l(y)))} = \mathbf{Var}(\sigma(l(0)))$  since  $(l(t))_{t \geq 0}$  is stationary. Note that  $\mathbf{Var}(\sigma(l(0))) \leq 1$  because  $0 \leq \sigma(x) \leq 1$  for all  $x$ . Then

$$\int_A \mathbf{Cov}(\sigma(l(x)), \sigma(l(y)))(xy)^{\alpha-1} dx dy \leq \int_A (xy)^{\alpha-1} dx dy \quad (3)$$

a tedious computation gives us

$$\int_A \mathbf{Var}(\sigma(l(x)))(xy)^{\alpha-1} dx dy \leq \int_A (xy)^{\alpha-1} dx dy \leq C \frac{(t+1)^{2\alpha-1}}{2\alpha-1} \quad (4)$$

for some constant  $C > 0$ .

We claim the following inequality for all  $(t, s) \in A^c$ ,

$$\mathbf{Cov}(\sigma(l(x)), \sigma(l(y))) \leq 2 \frac{\kappa(|x-y|)\mathbf{E}(\sigma(l(x)))^2}{\kappa(0) - \kappa(1)}.$$

The proof of the above inequality is given in Lemma 1. Let  $C > 0$  a large enough constant, then we have

$$\begin{aligned} \int_{A^c} \mathbf{Cov}(\sigma(l(x)), \sigma(l(y)))(xy)^{\alpha-1} dx dy &\leq \int_{A^c} 2 \frac{\kappa(|x-y|)\mathbf{E}(\sigma(l(x)))^2}{\kappa(0) - \kappa(1)} (xy)^{\alpha-1} dx dy \\ &\leq C \int_1^t \int_{x+1}^t \kappa(x-y)(xy)^{\alpha-1} dy dx \end{aligned} \quad (5)$$

Using the change of variables  $w = x$  and  $z = x - y$  we get from equation (5) that

$$\begin{aligned} \int_{A^c} \mathbf{Cov}(\sigma(l(x)), \sigma(l(y)))(xy)^{\alpha-1} dx dy &\leq C \int_1^t \int_z^t \kappa(z)w^{\alpha-1}(w-z)^{\alpha-1} dw dz \\ &\leq C \int_1^t \int_1^t \kappa(z)w^{2\alpha-2} dw dz \\ &\leq C \frac{t^{2\alpha-1}}{2\alpha} \int_0^t \kappa(z) dz \end{aligned} \quad (6)$$

Adding the integrals over  $A$  and  $A^c$ , we get that it exists a large constant  $C > 0$ , depending on  $\alpha$  such that for large enough  $t$ , it holds

$$\mathbf{Var}(X_t) \leq C t^{2\alpha-1} \int_0^t \kappa(s) ds. \quad (7)$$

Then for large enough  $t \geq 0$ , by Chebyshev's inequality and equations (1) and (7) it holds

$$\mathbf{P}(|X_t - \mathbf{E}(X_t)| \geq \mathbf{E}(X_t)/2) \leq \frac{4\mathbf{Var}(X_t)}{\mathbf{E}(X_t)^2} = \mathcal{O}\left(\frac{t^{2\alpha-1} \int_0^t \kappa(s) ds}{t^{2\alpha}}\right) = \frac{o(t)}{t}. \quad (8)$$

In the last step we use that  $\lim_{s \rightarrow \infty} \kappa(s) = 0$  which implies that  $\int_0^t \kappa(s) ds = o(t)$ .

Let  $B_t$  be the event  $B_t = \{|X_t - \mathbf{E}(X_t)| \geq \mathbf{E}(X_t)/2\}$ . Let  $(t_n)_{n \geq 1}$  be an increasing sequence of times, such that  $\mathbf{P}(B_{t_n}) \leq n^{-2}$  and  $t_n \rightarrow \infty$  as  $n$  tends to  $\infty$ . Observe it is always possible to find such  $t_n$  because equation (8). Observe  $\sum_{n \geq 1} \mathbf{P}(B_{t_n}) \leq \infty$ , then by using the Borel-Cantelli Lemma it holds that exists some finite  $N \geq 1$  such that all event  $B_{t_n}$  does not hold for  $n \geq N$ . Thus, for  $n \geq N$  the equation

$$|X_{t_n} - \mathbf{E}(X_{t_n})| \leq \mathbf{E}(X_{t_n})/2,$$

holds true, implying that

$$X_{t_n} \geq \mathbf{E}(X_{t_n})/2.$$

Using the above equation, for  $n \geq N$  we have

$$S(t_n) \leq e^{-X_{t_n}} \leq e^{-\mathbf{E}(X_{t_n})/2} \leq e^{-ct_n^\alpha},$$

for a small constant  $c > 0$ . Then since  $S(t)$  is decreasing it holds

$$\lim_{t \rightarrow \infty} S(t) = \lim_{n \rightarrow \infty} S(t_n) \leq \lim_{n \rightarrow \infty} e^{-ct_n^\alpha} = 0.$$

□

**Lemma 1.** For any  $t, s$  such that  $|t - s| > 1$  we have

$$\mathbf{Cov}(\sigma(l(x)), \sigma(l(y))) \leq 2 \frac{\kappa(|x - y|) \mathbf{E}(\sigma(l(x)))^2}{\kappa(0) - \kappa(1)}.$$

*Proof.* Let  $|t - s| > 1$ . Using that  $xy \leq \frac{x^2 + y^2}{2}$  we have

$$\begin{aligned} \mathbf{E}(\sigma(l(t))\sigma(l(s))) &= \int_{-\infty}^{\infty} \int_{-\infty}^{\infty} \sigma(x)\sigma(y) \frac{\exp\left\{-\frac{\kappa(0)(x^2 + y^2) - 2\kappa(t-s)xy}{2(\kappa(0)^2 - \kappa(t-s)^2)}\right\}}{2\pi(\kappa(0)^2 - \kappa(t-s)^2)^{1/2}} dx dy \\ &\leq \int_{-\infty}^{\infty} \int_{-\infty}^{\infty} \sigma(x)\sigma(y) \frac{\exp\left\{-\frac{(\kappa(0) - \kappa(t-s))(x^2 + y^2)}{2(\kappa(0)^2 - \kappa(t-s)^2)}\right\}}{2\pi(\kappa(0)^2 - \kappa(t-s)^2)^{1/2}} dx dy \\ &\leq \int_{-\infty}^{\infty} \int_{-\infty}^{\infty} \sigma(x)\sigma(y) \frac{\exp\left\{-\frac{(x^2 + y^2)}{2(\kappa(0) + \kappa(t-s))}\right\}}{2\pi(\kappa(0)^2 - \kappa(t-s)^2)^{1/2}} dx dy \\ &\leq \frac{\kappa(0) + \kappa(t-s)}{\kappa(0) - \kappa(t-s)} \mathbb{E}(\sigma(l))^2 \leq \frac{\kappa(0) + \kappa(t-s)}{\kappa(0) - \kappa(1)} \mathbb{E}(\sigma(l))^2. \end{aligned}$$

In the last inequality we use that  $\kappa(s)$  is non-increasing. Finally, by deleting  $\mathbf{E}(\sigma(l(0)))^2$  in both sides of the above equation gives us the covariance of  $\sigma(l(t))$  and  $\sigma(l(s))$ , which give us the corresponding bound.  $\square$

## 2 Survival Function for E-SGP

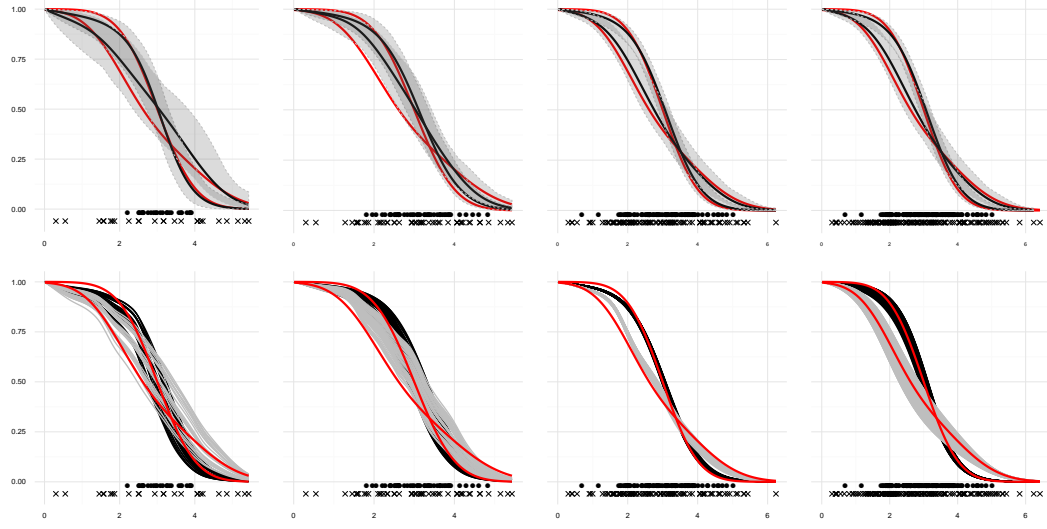

Figure 1: Exponential Model. First row: clean data, Second row: data with noisy covariates. Per columns we have 25,50,100 and 150 data points per each group (shown in  $X$ -axis) and data is increasing from left to right. Dots indicate data is generated from density  $p_0$ , crosses, from  $p_1$ . In the first row a confidence interval for each curve is given. In the second row each curve for each combination of noisy covariate is shown.
